# Supplementary material for: From Theory-Inspired to Theory-Based Interventions: A Protocol for Developing and Testing a Methodology for Linking Behaviour Change Techniques to Theoretical Mechanisms of Action
Source: Springer Nature journal article supplement (doi:10.1007/s12160-016-9816-6), 2016-07-11
Supplement: MOESM1 [file 10362814]

### Supplementary Materials

Table 1: List of 26 mechanisms of action included in Study 2

|     | <b>Mechanism of Action Definition</b>                                                                                                                                                                            | <b>Mechanism Label</b>                   |
|-----|------------------------------------------------------------------------------------------------------------------------------------------------------------------------------------------------------------------|------------------------------------------|
| 1.  | An awareness of the existence of something                                                                                                                                                                       | Knowledge                                |
| 2.  | An ability or proficiency acquired through practice                                                                                                                                                              | Skills                                   |
| 3.  | A coherent set of behaviours and displayed personal qualities of an individual in a social or work setting                                                                                                       | Social/ Professional Role and Identity   |
| 4.  | Beliefs about one's ability to successfully carry out a behaviour                                                                                                                                                | Beliefs about Capabilities               |
| 5.  | Confidence that things will happen for the best or that desired goals will be attained                                                                                                                           | Optimism                                 |
| 6.  | Beliefs about the consequences of a behaviour (i.e. perceptions about what will be achieved and/or lost by undertaking a behaviour, as well as the probability that a behaviour will lead to a specific outcome) | Beliefs about Consequences               |
| 7.  | Processes by which the frequency or probability of a response is increased through a dependent relationship or contingency with a stimulus or circumstance                                                       | Reinforcement                            |
| 8.  | A conscious decision to perform a behaviour or a resolve to act in a certain way                                                                                                                                 | Intentions                               |
| 9.  | Mental representations of outcomes or end states that an individual wants to achieve                                                                                                                             | Goals                                    |
| 10. | Ability to retain information, focus on aspects of the environment and choose between two or more alternatives                                                                                                   | Memory, Attention and Decision Processes |
| 11. | Aspects of a person's situation or environment that discourage or encourage the behaviour                                                                                                                        | Environmental Context and Resources      |
| 12. | Those interpersonal processes that can cause oneself to change one's thoughts, feelings or behaviours.                                                                                                           | Social Influences                        |
| 13. | A complex reaction pattern involving experiential, behavioural, and physiological elements                                                                                                                       | Emotion                                  |
| 14. | Behavioural, cognitive and/or emotional skills for managing or changing behaviour                                                                                                                                | Behavioural Regulation                   |
| 15. | The attitudes held and behaviours exhibited by other people within a social group                                                                                                                                | Norms                                    |
| 16. | One's <i>perceptions</i> of what most other people within a social group believe and do                                                                                                                          | Subjective Norms                         |
| 17. | The general evaluations of the behaviour on a scale ranging from negative to positive                                                                                                                            | Attitude towards the behaviour           |

|     |                                                                                                                                                                |                                            |
|-----|----------------------------------------------------------------------------------------------------------------------------------------------------------------|--------------------------------------------|
| 18. | Processes relating to the impetus that gives purpose or direction to behaviour and operates at a conscious or unconscious level                                | Motivation                                 |
| 19. | One's conception and evaluation of oneself, including psychological and physical characteristics, qualities and skills                                         | Self-image                                 |
| 20. | Deficit of something required for survival, well-being or personal fulfilment                                                                                  | Needs                                      |
| 21. | Moral, social or aesthetic principles accepted by an individual or society as a guide to what is good, desirable or important                                  | Values                                     |
| 22. | Processes through which current behaviour is compared against a particular standard                                                                            | Feedback Processes                         |
| 23. | A process by which thoughts, feelings and motivational states observed in others are internalised and replicated without the need for conscious awareness      | Social Learning / Imitation                |
| 24. | Processes by which behaviour is triggered from either the external environment, the performance of another behaviour, or from ideas appearing in consciousness | Behavioural Cueing                         |
| 25. | Evaluations of an object, person, group, issue or concept on a scale ranging from negative to positive                                                         | General Attitudes/ Beliefs                 |
| 26. | Perceptions of the likelihood that one is vulnerable to a threat                                                                                               | Perceived susceptibility/<br>vulnerability |





## Appendix C

### Study 2 Expert Agreed Explicit Links: Expert Recruitment Self-Evaluation Form

#### 1. To what extent have you:

(a) Designed or helped to design a behaviour change intervention(s) that used specific behaviour change techniques (BCTs)?

Extensively     To Some Extent     Not at all

---

(b) Used a taxonomy of BCTs (e.g. BCT Taxonomy v1) to code, design, or evaluate a behaviour change intervention?

Extensively     To Some Extent     Not at all

---

(c) Designed or helped to design a behaviour change intervention(s) that was specifically grounded in a behaviour change theory/theories?

Extensively     To Some Extent     Not at all

---

(d) Published papers/manuals/protocols of interventions that specify component BCTs?

Extensively     To Some Extent     Not at all

---

(e) Published papers/manuals/protocols of interventions that specify behaviour change theory/theories?

Extensively     To Some Extent     Not at all

---

(f) Undertaken a narrative or systematic review of behaviour change literature specifying interventions in terms of BCTs?

Extensively     To Some Extent     Not at all

---

(g) Undertaken a narrative or systematic review of behaviour change literature specifying interventions in terms of behaviour change theory?

Extensively     To Some Extent     Not at all

---

2. For approximately how many hours have you used BCT methodology?  
(e.g. 0-5, 10-20, 25-50, 50-100, 100+)

\_\_\_\_\_

3. For how many studies have you used BCT methodology?

\_\_\_\_\_

4. For how many studies have you explicitly used behaviour change theory?

\_\_\_\_\_

5. How would you rate your knowledge/expertise in the following  
(where 0 = no knowledge/expertise and 7 = profound knowledge/expertise):

|                                                          |   |   |   |   |   |   |   |   |
|----------------------------------------------------------|---|---|---|---|---|---|---|---|
| Behaviour change theories                                | 0 | 1 | 2 | 3 | 4 | 5 | 6 | 7 |
| Behaviour change techniques                              | 0 | 1 | 2 | 3 | 4 | 5 | 6 | 7 |
| Behaviour change interventions<br>(evaluation or design) | 0 | 1 | 2 | 3 | 4 | 5 | 6 | 7 |

6. Other relevant experience (please specify):

7. Please provide your contact details:

Name:

Email:
